# Supplementary material
Source: PubMed Central journal article supplement (PMC3720143)
Supplement: NIHMS94500-supplement-Supplemental_Fig_1.pdf [file NIHMS94500-supplement-Supplemental_Fig_1.pdf]

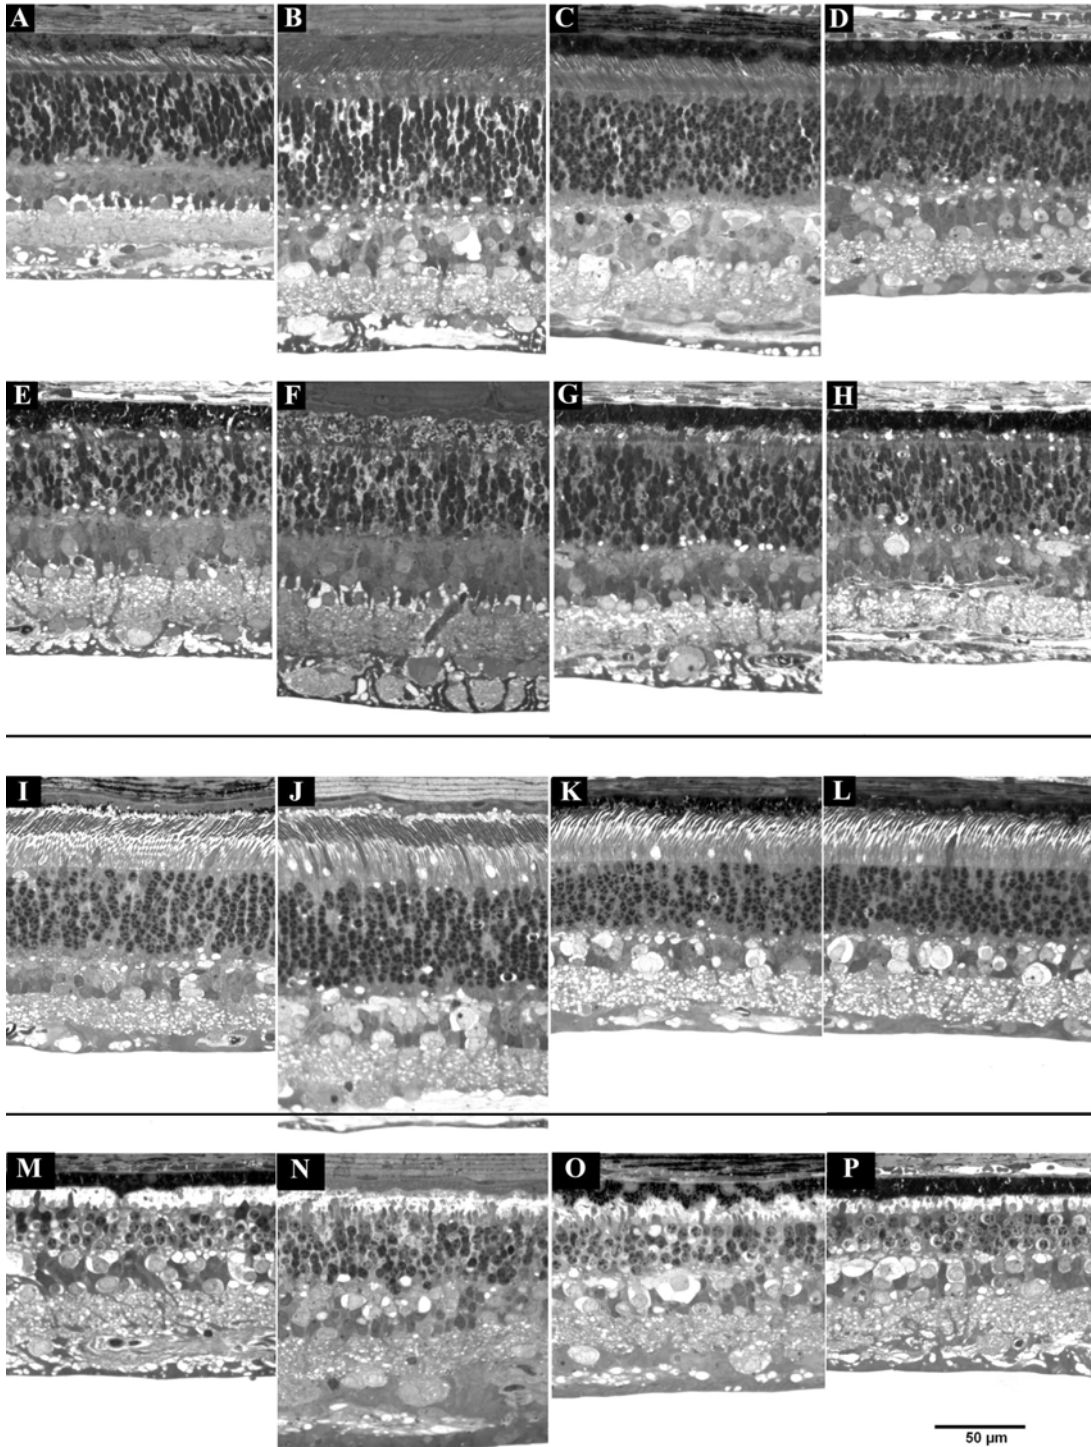

Supplemental Information Figure 1. Comparison of retinal histology at four different retinal regions (from left to right regions 2, 4, 5 and 7 – see Figure 1. Region 2 is dorsal peripheral, 4 is central tapetal, 5 is central non-tapetal and 7 is ventral peripheral). A-D a

control puppy at 5 weeks of age. E-H a mutant puppy at 5 weeks of age. I-L a control puppy at 16 weeks of age. E-H a mutant puppy at 16 weeks of age. Size bar = 50  $\mu$ m.

---
