# Supplementary material
Source: PubMed Central journal article supplement (PMC3720143)
Supplement: NIHMS94500-supplement-Supplemental_Table_1.pdf [file NIHMS94500-supplement-Supplemental_Table_1.pdf]

Table 1. Details of dogs utilized in study

| Identification             | Breed          | Age weeks | Histopath | EM | IHC | TUNEL & Caspase 3 (Frozen) | Caspase 3 Paraffin | Biochemistry |
|----------------------------|----------------|-----------|-----------|----|-----|----------------------------|--------------------|--------------|
| <b>Affected (PDE6A-/-)</b> |                |           |           |    |     |                            |                    |              |
| 03-087                     | Corgi          | 1         | +         |    |     |                            |                    |              |
| 03-209                     | Corgi          | 2         | +         |    |     |                            |                    | +            |
| 03-091                     | Corgi          | 2         | +         | +  | +   |                            | +                  |              |
| 03-210                     | Corgi          | 2         | +         | +  |     |                            | +                  | +            |
| 03-211                     | Corgi          | 3         | +         | +  |     |                            |                    | +            |
| 05-057                     | Corgi          | 3         | +         |    |     |                            |                    |              |
| 04-055                     | Corgi          | 3         | +         |    | +   | +                          | +                  |              |
| 03-212                     | Corgi          | 4         | +         | +  | +   |                            |                    |              |
| 05-113                     | Beagle x Corgi | 4         | +         | +  | +   | +                          |                    |              |
| 05-111                     | Beagle x Corgi | 4         | +         |    | +   | +                          |                    |              |
| 03-213                     | Corgi          | 4         | +         | +  | +   | +                          |                    |              |
| 03-214                     | Corgi          | 4         | +         | +  | +   |                            | +                  |              |
| 03-064                     | Corgi          | 4         | +         |    |     |                            |                    | +            |
| 06-005                     | Beagle x Corgi | 5         | +         | +  |     |                            |                    |              |
| 03-215                     | Corgi          | 5         | +         | +  |     |                            |                    |              |
| 04-227                     | Corgi          | 5         | +         | +  |     |                            |                    |              |
| 03-216                     | Corgi          | 6         | +         | +  | +   |                            |                    | +            |
| 03-217                     | Corgi          | 6         | +         | +  | +   |                            |                    |              |
| 04-099                     | Corgi          | 6         | +         |    |     |                            | +                  |              |
| 03-210                     | Corgi          | 7         | +         |    |     |                            |                    | +            |
| 03-088                     | Corgi          | 7         | +         |    | +   |                            | +                  |              |
| 02-079                     | Corgi          | 7         | +         | +  | +   |                            |                    |              |
| 03-221                     | Corgi          | 8         | +         |    | +   |                            |                    |              |
| 04-059                     | Corgi          | 8         | +         |    | +   |                            |                    |              |
| 04-095                     | Corgi          | 8         | +         |    |     |                            |                    |              |
| 05-140                     | Corgi          | 8         | +         |    | +   | +                          |                    |              |
| 03-225                     | Corgi          | 8         | +         | +  |     |                            |                    | +            |
| 03-043                     | Corgi          | 9         | +         |    | +   |                            |                    |              |
| 03-090                     | Corgi          | 9         | +         | +  |     |                            | +                  |              |
| 02-078                     | Corgi          | 9         | +         | +  |     |                            |                    |              |
| 03-089                     | Corgi          | 11        | +         | +  |     |                            |                    |              |
| 04-062                     | Corgi          | 12        | +         |    |     |                            |                    | +            |
| 04-0-86                    | Corgi          | 12        | +         |    | +   |                            |                    |              |
| 03-226                     | Corgi          | 16        | +         |    |     |                            |                    |              |
| 03-067                     | Corgi          | 16        | +         |    |     |                            |                    |              |
| 04-058                     | Corgi          | 16        | +         |    | +   |                            |                    |              |
| 03-029                     | Corgi          | 18        | +         |    |     |                            |                    |              |

| Identification            | Breed          | Age weeks | Histopath | EM | IHC | TUNEL & Caspase 3 (Frozen) | Caspase 3 Paraffin | Biochemistry |
|---------------------------|----------------|-----------|-----------|----|-----|----------------------------|--------------------|--------------|
| <b>Carrier (PDE6A+/-)</b> |                |           |           |    |     |                            |                    |              |
| 03-222                    | Corgi          | 1         |           |    |     |                            |                    | +            |
| 06-006                    | Beagle x Corgi | 2         | +         | +  |     |                            |                    |              |
| 03-223                    | Corgi          | 2         | +         |    | +   |                            |                    |              |
| 03-224                    | Corgi          | 2         | +         |    |     |                            |                    |              |
| 03-227                    | Corgi          | 2         | +         | +  | +   |                            |                    |              |
| 04-100                    | Corgi          | 3         | +         |    |     |                            |                    |              |
| 05-114                    | Beagle x Corgi | 4         | +         | +  |     | +                          |                    |              |
| 05-112                    | Beagle x Corgi | 4         | +         |    |     | +                          |                    |              |
| 03-132                    | Beagle x Corgi | 4         | +         |    |     |                            |                    |              |
| 05-137                    | Corgi          | 4         | +         | +  |     | +                          |                    |              |
| 04-085                    | Corgi          | 5         | +         |    | +   |                            |                    |              |
| 03-126                    | Beagle x Corgi | 5         | +         | +  | +   |                            |                    |              |
| 03-208                    | Corgi          | 5         | +         | +  | +   |                            | +                  |              |
| 04-204                    | Beagle x Corgi | 5         | +         | +  |     |                            |                    |              |
| 02-077                    | Corgi          | 7         | +         |    |     |                            |                    | +            |
| 06-003                    | Beagle x Corgi | 8         | +         |    |     |                            |                    |              |
| 02-166                    | Corgi          | 9         | +         |    | +   |                            | +                  |              |
| 04-161                    | Beagle x Corgi | 9         | +         |    |     |                            |                    |              |
| 02-081                    | Corgi          | 9         | +         | +  |     | +                          |                    | +            |
| 04-163                    | Corgi          | 11        | +         |    |     |                            |                    |              |
| 02-167                    | Corgi          | 12        | +         |    |     |                            |                    |              |
| <b>Normal (PDE6A+/+)</b>  |                |           |           |    |     |                            |                    |              |
| F668                      | Mixed          | 2         | +         |    | +   |                            | +                  |              |
| 03-085                    | Mixed          | 3         | +         |    | +   |                            |                    |              |
| F667                      | Mixed          | 3         | +         | +  | +   |                            |                    |              |
| 04-103                    | Corgi          | 3         | +         |    |     |                            | +                  | +            |
| 03-102                    | Beagle x Corgi | 3         | +         |    |     |                            |                    |              |
| 04-201                    | Beagle x Corgi | 5         | +         | +  |     | +                          | +                  |              |
| 04-105                    | Corgi          | 5         | +         | +  |     |                            |                    |              |
| 03-082                    | Mixed          | 5         | +         | +  |     |                            |                    |              |
| 04-202                    | Beagle x Corgi | 7         | +         |    | +   |                            |                    |              |
| 04-203                    | Mixed          | 7         | +         |    | +   |                            |                    |              |
| 04-205                    | Mixed          | 7         | +         |    |     |                            |                    |              |
| 04-088                    | Corgi          | 7         | +         | +  | +   |                            | +                  |              |
| 02-168                    | Beagle x Corgi | 8         | +         |    | +   |                            |                    |              |
| 03-103                    | Beagle x Corgi | 8         | +         |    |     |                            | +                  |              |
| 03-206                    | Corgi          | 8         | +         | +  | +   |                            |                    | +            |
| 03-057                    | Beagle x Corgi | 10        | +         |    |     |                            |                    |              |
| 04-207                    | Beagle x Corgi | 12        | +         |    |     |                            |                    | +            |
| 02-154                    | Beagle x Corgi | 12        | +         |    |     |                            |                    | +            |
| 02-153                    | Mixed          | 16        | +         |    | +   |                            |                    |              |
| 04-208                    | Beagle x Corgi | 16        | +         |    |     |                            |                    |              |
| 03-207                    | Corgi          | 16        | +         |    |     |                            |                    |              |
